# Supplementary material
Source: publisher figshare collection journal article supplement (https://acs.figshare.com/ndownloader/files/3614259)
Supplement: Supplementary file 1 [file 3614259]

## SUPPLEMENTAL SECTION

### A Radiofluorinated Divalent Cystine Knot Peptide for Tumor PET Imaging

Lei Jiang,<sup>†,‡,§</sup> Richard H. Kimura,<sup>‡,§</sup> Xiaowei Ma,<sup>‡</sup> Yingfeng Tu,<sup>‡</sup> Zheng Miao,<sup>‡</sup> Bin Shen,<sup>‡</sup> Frederick T. Chin,<sup>‡</sup> Hongcheng Shi,<sup>†</sup> Sanjiv Sam Gambhir,<sup>‡</sup> and Zhen Cheng<sup>\*,‡</sup>

<sup>†</sup>Department of Nuclear Medicine, Zhongshan Hospital, Fudan University, 180 Fenglin Road, Shanghai, China 200032

<sup>‡</sup>Molecular Imaging Program at Stanford (MIPS), Department of Radiology and Bio-X Program, Canary Center at Stanford for Cancer Early Detection, Stanford University, Stanford, California 94305, United States

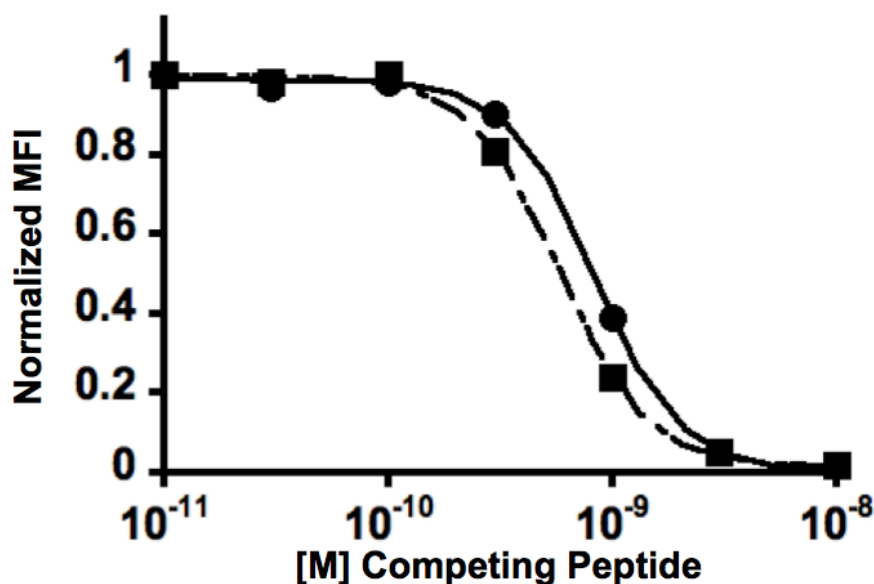

**SUPPLEMENTAL FIGURE 1. Binding Affinity of 3-4A and <sup>19</sup>F-FP-3-4A.** The IC<sub>50</sub> of <sup>19</sup>F-FP-3-4A was compared that of to 3-4A. These competing peptides were incubated with yeast (surface) displaying 3-4A c-myc fusion protein, and allowed to compete with the soluble peptides for 20nM integrin  $\alpha_v\beta_3$ . The IC<sub>50</sub> of soluble 3-4A and <sup>19</sup>F-FP-3-4A was 615.6 +/- 305.8 pM and 810.4 +/- 343.6pM, respectively

**SUPPLEMENTAL METHOD 1.** *Saccharomyces Cerevisiae* cells were transformed with plasmid, pCT, encoding dual RGD knottin 3-4A. Cells were grown in SD-CAA media and proteins were induced in SG-CAA (1). For each time point, 100,000 cells expressing 3-4A was incubated with 20nM integrin  $\alpha_v\beta_3$  ([www.rndsystems.com](http://www.rndsystems.com)), and several serially-diluted concentrations of peptides 3-4A and 19F-FP-3-4A to generate titration curves. Yeast surface expression of fusion proteins was measured with a chicken anti-c-myc IgY antibody (A-21281, [www.invitrogen.com](http://www.invitrogen.com)), and Alexa-555 labeled goat anti-chicken IgG antibody (A-21437, [www.invitrogen.com](http://www.invitrogen.com)). Integrin  $\alpha_v\beta_3$  binding was measured with FITC-labeled anti integrin  $\alpha_v$  antibody (Clone NK1-M9, [www.biolegend.com](http://www.biolegend.com)).

Mean Fluorescence Intensity (MFI) is defined by FITC signal intensity divided by Alexa 555 signal intensity. MFI values (Y-axis) were determined for each concentration of competing peptide (X-axis). Kaleidagraph ([www.synergy.com](http://www.synergy.com)) was used to determine the IC<sub>50</sub> values.

## REFERENCES

1. Kimura, R. H.; Jones, D. S.; Jiang, L.; Miao, Z.; Cheng, Z.; Cochran, J. R. Functional mutation of multiple solvent-exposed loops in the Ecballium elaterium trypsin inhibitor-II cystine knot miniprotein. *PLoS One* **2011**, 6, (2), e16112.
